# Supplementary material for: Flower-like Fe7S8/Bi2S3 superstructures with improved near-infrared absorption for efficient chemo-photothermal therapy
Source: Royal Society of Chemistry journal article supplement (doi:10.1039/c8dt04280b), 2019-01-01
Supplement: c8dt04280b1.pdf [file c8dt04280b1.pdf]

## Supporting Information

### **Flower-like Fe<sub>7</sub>S<sub>8</sub>/Bi<sub>2</sub>S<sub>3</sub> Superstructures with Improved Near-Infrared Absorption for Efficient Chemo-Photothermal Therapy**

Qing Cao,<sup>a</sup> Xin Guo,<sup>c</sup> Wenlong Zhang,<sup>a</sup> Guoqiang Guan,<sup>a</sup> Xiaojuan Huang,<sup>d</sup> Shu-Ang He,<sup>a</sup> Mingdong Xu,<sup>a</sup> Rujia Zou,<sup>\*a</sup> Xinwu Lu,<sup>\*c</sup> and Junqing Hu<sup>\*a,b</sup>

a. State Key Laboratory for Modification of Chemical Fibers and Polymer Materials, International Joint Laboratory for Advanced Fiber and Low-dimension Materials, College of Materials Science and Engineering, Donghua University, Shanghai 201620, P.R. China

b. College of Health Science and Environmental Engineering, Shenzhen Technology University, Shenzhen 518118, China

c. Department of Vascular Surgery, Shanghai Ninth People's Hospital, Shanghai JiaoTong University School of Medicine, Shanghai 200011, China

d. Department of Oral and Maxillofacial-Head Neck Oncology, Shanghai Ninth People's Hospital, College of Stomatology, Shanghai Jiao Tong University School of Medicine; National Clinical Research Center for Oral Diseases; Shanghai Key Laboratory of Stomatology & Shanghai Research Institute of Stomatology, Shanghai 200011, China

\* Corresponding author

E-mail address: rjzou@dhu.edu.cn, luxinwu@shsmu.edu.cn, hu.junqing@dhu.edu.cn

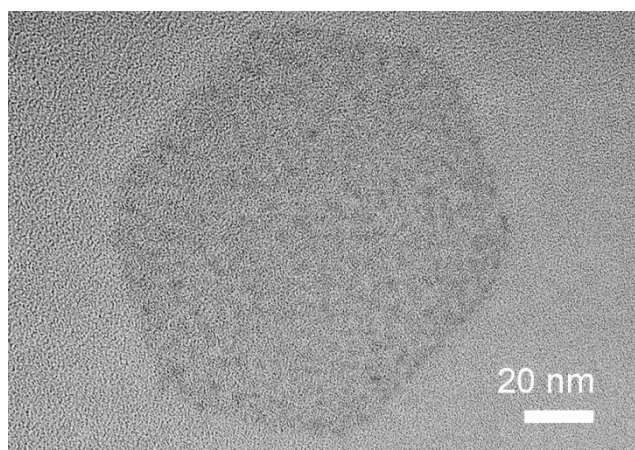

**Fig. S1** TEM image of the Bi<sub>2</sub>S<sub>3</sub> nanosheets.

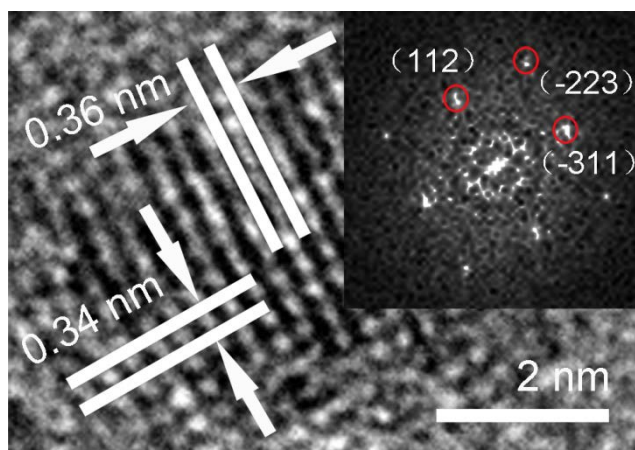

**Fig. S2** HRTEM image of an Fe<sub>7</sub>S<sub>8</sub> nanoparticle from an Fe<sub>7</sub>S<sub>8</sub>/Bi<sub>2</sub>S<sub>3</sub> nanoflower (insertion: FFT pattern of this HRTEM image).

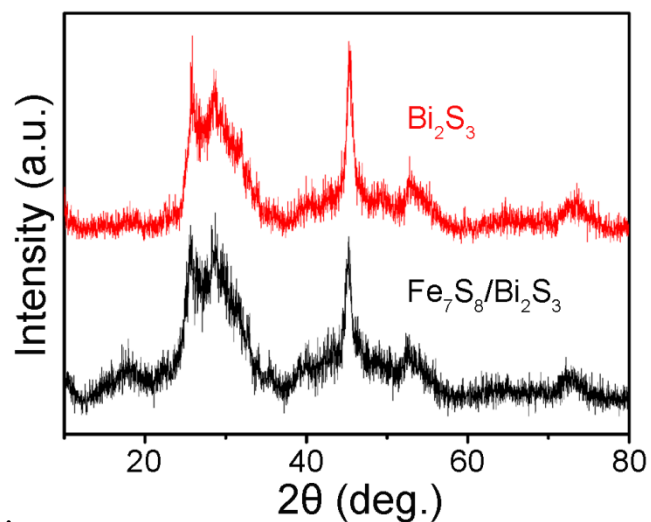

**Fig. S3** XRD patterns of the  $\text{Bi}_2\text{S}_3$  nanosheets (upper pattern) and  $\text{Fe}_7\text{S}_8/\text{Bi}_2\text{S}_3$  nanoflowers (bottom pattern).

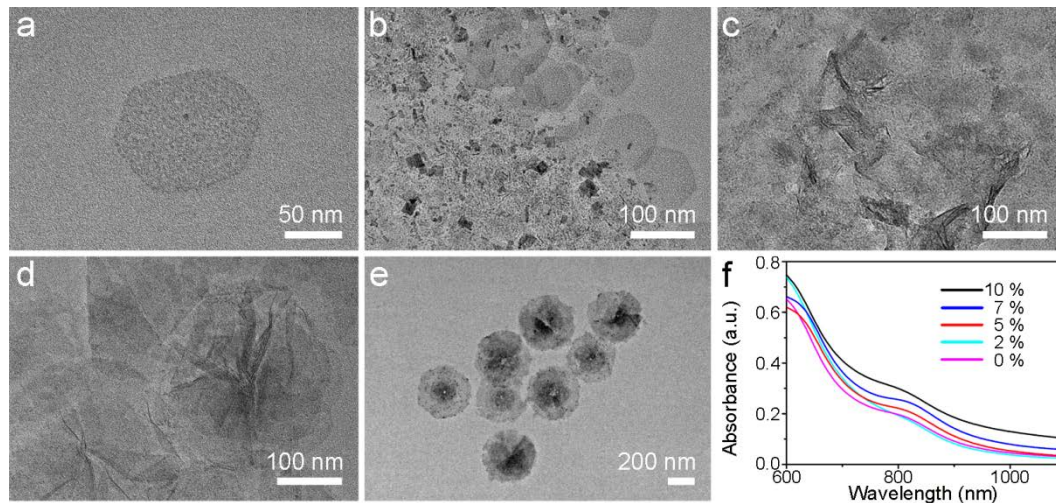

**Fig. S4** (a-e) TEM images of samples with various percentages of Fe precursor: (a) 0% ( $\text{Bi}_2\text{S}_3$  nanosheets), (b) 2%, (c) 5%, (d) 7%, and (e) 10% ( $\text{Fe}_7\text{S}_8/\text{Bi}_2\text{S}_3$  nanoflowers). (f) UV-Vis-NIR absorption spectrum of the samples with the same concentration (25  $\mu\text{g}/\text{mL}$ ).

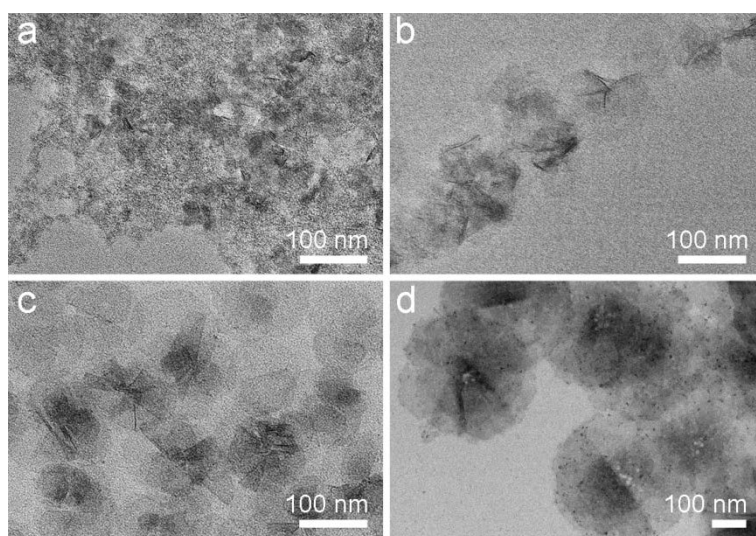

**Fig. S5** TEM images of the products prepared at different reaction times: (a) 1 h, (b) 3 h, (c) 6 h, and (d) 12 h (final products).

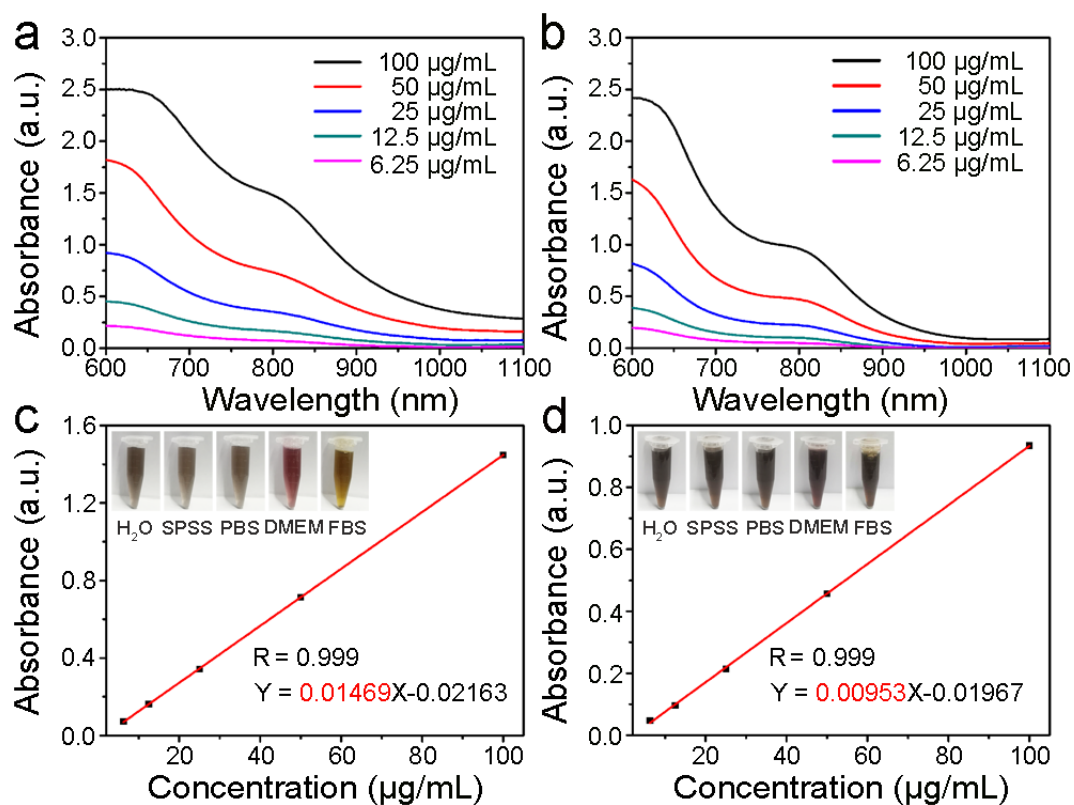

**Fig. S6** (a, b) UV-Vis-NIR absorption spectra of the  $\text{Fe}_7\text{S}_8/\text{Bi}_2\text{S}_3$  nanoflowers and  $\text{Bi}_2\text{S}_3$  nanosheets' aqueous dispersions with different concentrations. (c, d) Linear fitting of

the absorbance at 808 nm versus the  $\text{Fe}_7\text{S}_8/\text{Bi}_2\text{S}_3$  and  $\text{Bi}_2\text{S}_3$  concentration (insertion: the dispersion of the  $\text{Fe}_7\text{S}_8/\text{Bi}_2\text{S}_3$  nanoflowers and  $\text{Bi}_2\text{S}_3$  nanosheets in  $\text{H}_2\text{O}$ , SPSS, PBS, DMEM and FBS solutions, respectively).

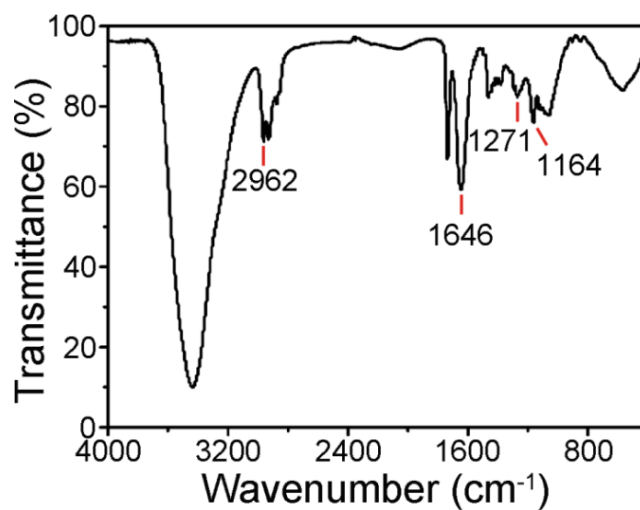

**Fig. S7** FTIR spectroscopy of  $\text{Fe}_7\text{S}_8/\text{Bi}_2\text{S}_3$  nanoflowers.

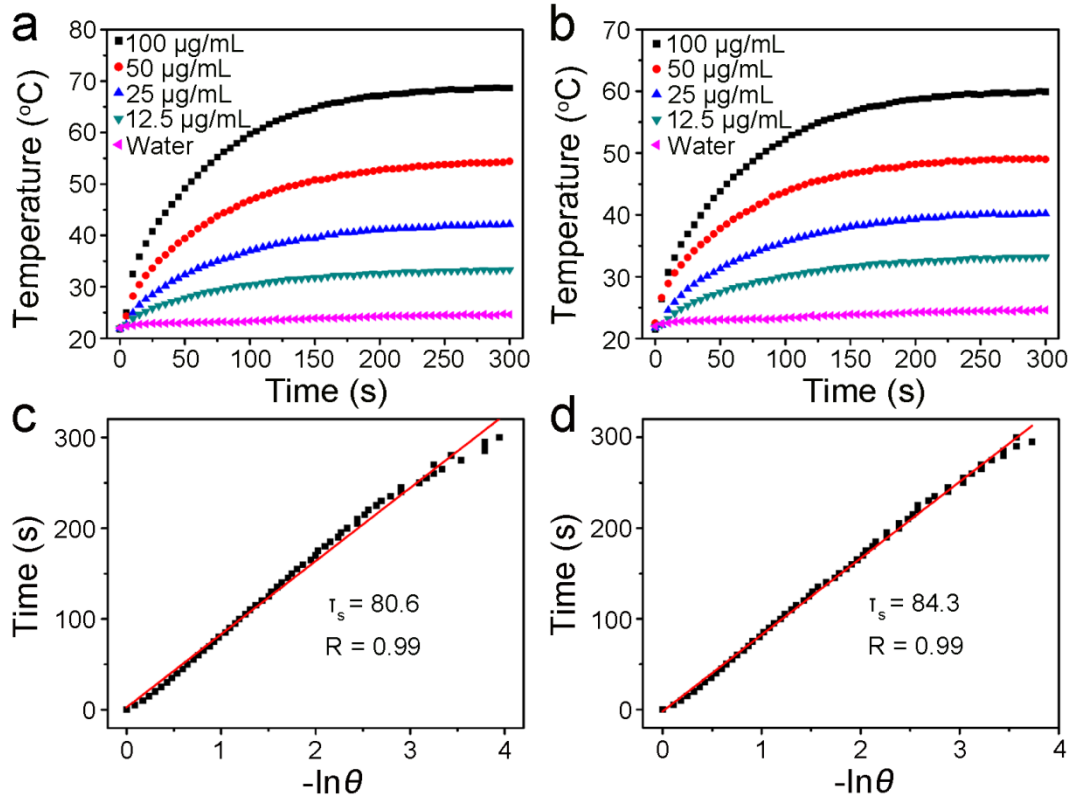

**Fig. S8** (a, b) Temperature elevation of the  $\text{Fe}_7\text{S}_8/\text{Bi}_2\text{S}_3$  nanoflowers and  $\text{Bi}_2\text{S}_3$  nanosheets' aqueous dispersions with different concentrations under an 808 nm laser ( $1 \text{ W/cm}^2$ ) for 5 min. (c, d) Linear fitting of the cooling time data of the curves of the  $\text{Fe}_7\text{S}_8/\text{Bi}_2\text{S}_3$  nanoflowers and  $\text{Bi}_2\text{S}_3$  nanosheets from Fig. 2(c) vs. the responding negative natural logarithm of the temperature driving force ( $\theta$ ).



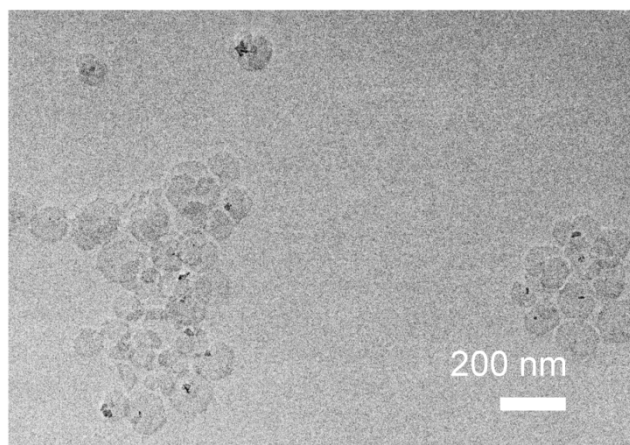

**Fig. S9** TEM image of the Bi<sub>2</sub>S<sub>3</sub> nanosheets' solution after laser irradiation.

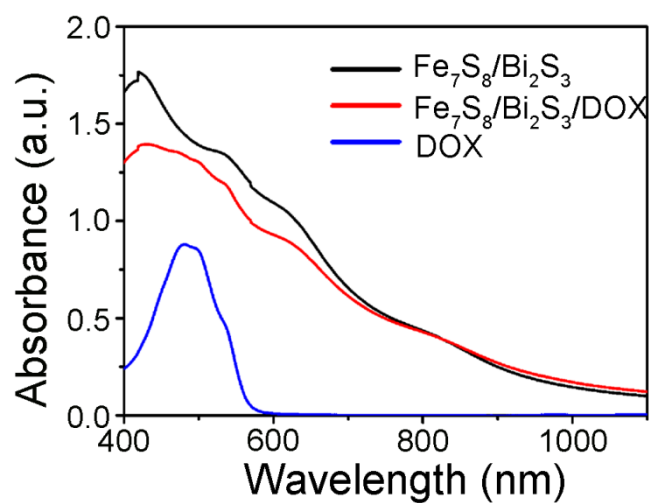

**Fig. S10** UV-Vis-NIR spectra of the aqueous solutions of the DOX, Fe<sub>7</sub>S<sub>8</sub>/Bi<sub>2</sub>S<sub>3</sub>, and Fe<sub>7</sub>S<sub>8</sub>/Bi<sub>2</sub>S<sub>3</sub>/DOX.

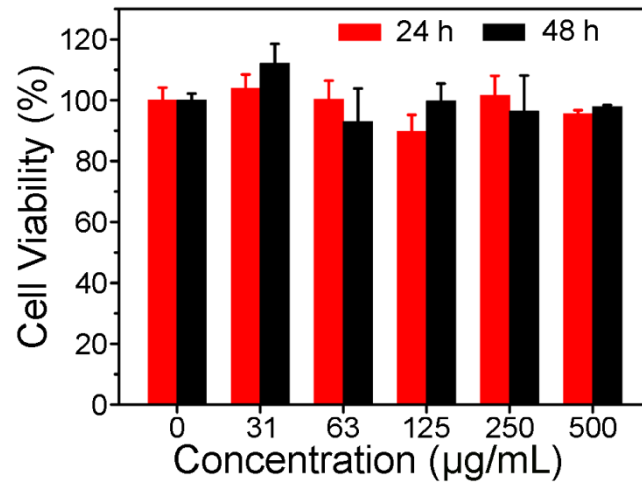

**Fig. S11** Cell viability of 7721 cells after being treated with Fe<sub>7</sub>S<sub>8</sub>/Bi<sub>2</sub>S<sub>3</sub> nanoflowers at various concentrations for 24 h and 48 h.

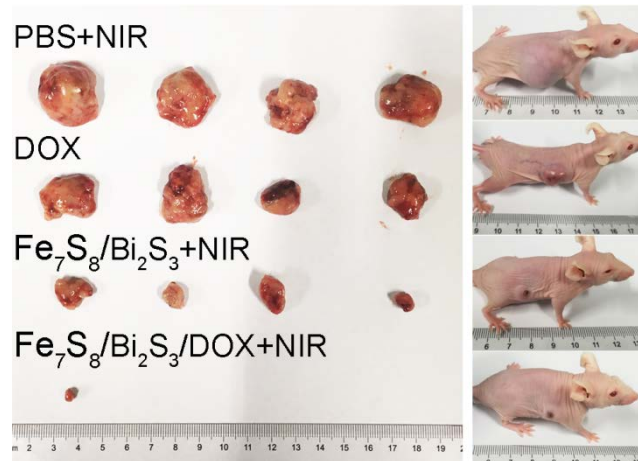

**Fig. S12** Photos of the tumor-bearing mice and tumors after 20 days of treatments.



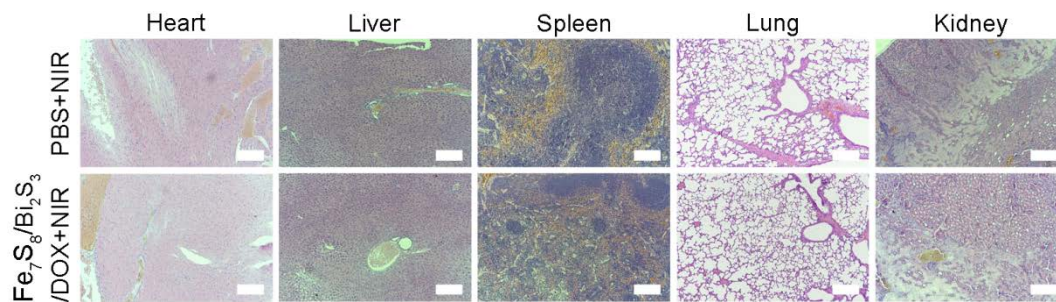

**Fig. S13** H&E stained tissue sections of heart, liver, spleen, lung and kidney from the mice in PBS + laser and  $\text{Fe}_7\text{S}_8/\text{Bi}_2\text{S}_3/\text{DOX}$  + laser groups at 20<sup>th</sup> day after treatment. The scale bar is 145  $\mu\text{m}$ .

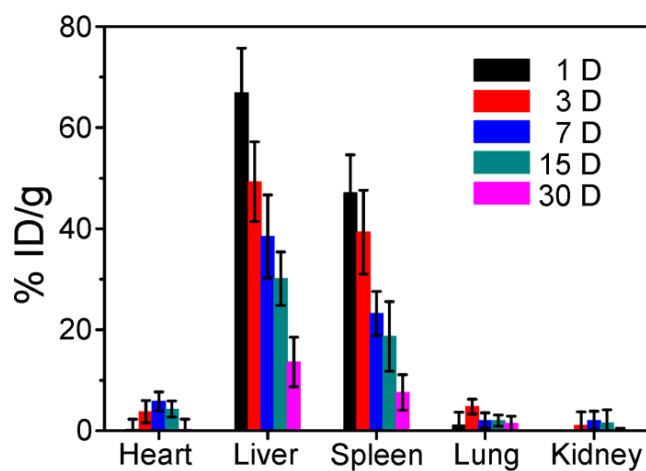

**Fig. S14** The biodistribution of Bi in main organs including heart, liver, spleen, lung and kidney at 1<sup>st</sup>, 3<sup>rd</sup>, 7<sup>th</sup>, 15<sup>th</sup>, 30<sup>th</sup> day after i.v. injection with the  $\text{Fe}_7\text{S}_8/\text{Bi}_2\text{S}_3$  nanoflowers (1 mg/mL, 200  $\mu\text{L}$ ).
